# Supplementary material for: Screening of Inhibitory Effects of Polyphenols on Akt-Phosphorylation in Endothelial Cells and Determination of Structure-Activity Features
Source: PubMed Central journal article supplement (PMC6627700; doi:10.3390/biom9060219), 2019-06-05
Supplement: biomolecules-09-00219-s001.pdf [file biomolecules-09-00219-s001.pdf]

## Supplementary Material S1

**Table S1: Comprehensive screening for effects of polyphenols on Akt-phosphorylation (Ser473) in Ea.hy926 cells: normalized values**

**Group I: Substances with pronounced inhibitory potential (> 20 %)**

|            |                  |           |             |             |          |         |
|------------|------------------|-----------|-------------|-------------|----------|---------|
| [%]        | Negative control | Quercetin | Resveratrol | Apigenin    | Luteolin | 6-HF    |
| Mean       | 100.00           | 64.29     | 73.96       | 68.21       | 55.69    | 73.14   |
| Inhibition | 0.00             | 35.71     | 26.04       | 31.79       | 44.31    | 26.86   |
| S.D.       | 5.19             | 8.33      | 5.58        | 6.16        | 17.95    | 7.78    |
| n          | 37               | 6         | 5           | 5           | 6        | 2       |
| [%]        | 6-MF             | Chrysin   | 7,8-DHF     | Urolithin A | Fisetin  | Flavone |
| Mean       | 75.11            | 78.30     | 79.68       | 64.72       | 71.91    | 77.76   |
| Inhibition | 24.89            | 21.70     | 20.32       | 35.28       | 28.09    | 22.24   |
| S.D.       | 10.29            | N/A       | N/A         | 11.80       | 9.09     | 2.28    |
| n          | 2                | 1         | 1           | 6           | 3        | 2       |

6-HF= 6-Hydroxyflavone; 6-MF= 6-Methoxyflavone; 7,8-DHF= 7,8-Dihydroxyflavone

**Group II: Substances with inhibitory potential between 10 % and 20 %**

|            |                  |              |       |           |              |            |
|------------|------------------|--------------|-------|-----------|--------------|------------|
| [%]        | Negative control | Pinostilbene | 7-MF  | Baicalein | Ellagic Acid |            |
| Mean       | 100.00           | 80.66        | 81.61 | 81.82     | 86.02        |            |
| Inhibition | 0.00             | 19.34        | 18.39 | 18.18     | 13.98        |            |
| S.D.       | 5.19             | 14.45        | N/A   | N/A       | 5.64         |            |
| n          | 37               | 2            | 1     | 1         | 2            |            |
| [%]        | Urolithin D      | (-)-GCG      | 3-MF  | 3,4'-DHF  | Myricetin    | Kaempferol |
| Mean       | 88.83            | 87.77        | 87.15 | 89.31     | 81.09        | 82.98      |
| Inhibition | 11.17            | 12.23        | 12.85 | 10.69     | 18.91        | 17.02      |
| S.D.       | N/A              | N/A          | N/A   | N/A       | N/A          | 11.81      |
| n          | 1                | 1            | 1     | 1         | 1            | 3          |

7-MF= 7-Methoxyflavone; (-)-GCG= (-)-Gallocatechin gallate; 3-MF= 3-Methoxyflavone; 3,4'-DHF= 3,4'-Dihydroxyflavone

**Group III: Substances with slight inhibitory potential between 5 % and 10 %**

|            |                  |           |           |       |             |       |
|------------|------------------|-----------|-----------|-------|-------------|-------|
| [%]        | Negative control | Genistein | Taxifolin | 3-HF  | Urolithin B | Morin |
| Mean       | 100.00           | 90.95     | 91.31     | 93.66 | 94.78       | 90.31 |
| Inhibition | 0.00             | 9.05      | 8.69      | 6.34  | 5.22        | 9.69  |
| S.D.       | 5.19             | N/A       | N/A       | 4.22  | N/A         | N/A   |
| n          | 37               | 1         | 1         | 2     | 1           | 1     |

3-HF= 3-Hydroxyflavone;

**Group IV: Substances with no inhibitory potential (Not hits)**

|            |                  |              |               |             |             |                  |
|------------|------------------|--------------|---------------|-------------|-------------|------------------|
| [%]        | Negative control | Caffeic acid | M1            | Urolithin C | EPI         | EGCG             |
| Mean       | 100.00           | 99.01        | 100.33        | 100.08      | 104.23      | 102.03           |
| Inhibition | 0.00             | 0.99         | -0.33         | -0.08       | -4.23       | -2.03            |
| S.D.       | 5.19             | N/A          | N/A           | N/A         | N/A         | N/A              |
| n          | 37               | 1            | 1             | 1           | 1           | 1                |
| [%]        | 3-H-4'-MF        | Wogonoside   | Pterostilbene | 3-MS        | Piacetannol | Chlorogenic Acid |
| Mean       | 97.23            | 105.02       | 105.96        | 100.93      | 102.73      | 96.41            |
| Inhibition | 2.77             | -5.02        | -5.96         | -0.93       | -2.73       | 3.59             |
| S.D.       | N/A              | N/A          | 1.59          | 9.99        | N/A         | N/A              |
| n          | 1                | 1            | 2             | 2           | 1           | 1                |

EPI= Epigallocatechin; EGCG= Epigallocatechin gallate; 3-H-4'-MF= 3-Hydroxy-4'-Methoxyflavone; MS= 3,4',5-Trimethoxy-trans-stilbene;

3-

|            |              |                 |            |        |              |          |         |
|------------|--------------|-----------------|------------|--------|--------------|----------|---------|
| [%]        | (+)-Catechin | (-)-Epicatechin | Naringenin | M2     | Ferulic acid | Baicalin | Vitexin |
| Mean       | 105.10       | 110,73          | 107,32     | 109.35 | 108.32       | 110.85   | 108,51  |
| Inhibition | -5.10        | -10,73          | -7,32      | -9.35  | -8.32        | -10.85   | -8,51   |
| S.D.       | 17.14        | 4.90            | N/A        | 8.90   | 21.35        | N/A      | N/A     |
| n          | 4            | 3               | 1          | 3      | 3            | 1        | 1       |

**Table S2: Results from Western blot analysis for effects of polyphenols on Akt-phosphorylation (Ser473 and Thr308) in Ea.hy926 cells: normalized values**

**A) pAkt Ser473**

| [%]        | Negative control | Quercetin | Resveratrol | Apigenin | Luteolin         |
|------------|------------------|-----------|-------------|----------|------------------|
| Mean       | 100.00           | 59.54     | 74.15       | 77.43    | 70.04            |
| Inhibition | 0.00             | 40.46     | 25.85       | 22.57    | 29.96            |
| S.D.       | 9.73             | 4.83      | 5.72        | 10.30    | 11.06            |
| n          | 29               | 5         | 6           | 6        | 6                |
| [%]        | (+)-Catechin     | Genistein | Taxifolin   | 3-MS     | Positive control |
| Mean       | 109.51           | 93.23     | 99.44       | 91.68    | 8.16             |
| Inhibition | -9.51            | 6.67      | 0.56        | 8.32     | 91.84            |
| S.D.       | 15.35            | 18.98     | 17.96       | 14.16    | 2.18             |
| n          | 4                | 6         | 5           | 3        | 3                |

3-MS= 3,4',5-Trimethoxy-trans-stilbene; Positive control – serum free starving overnight

**B) pAkt Thr308**

| [%]        | Negative control | Quercetin | Resveratrol | Apigenin | Luteolin         |
|------------|------------------|-----------|-------------|----------|------------------|
| Mean       | 100.00           | 64.29     | 68.22       | 71.90    | 73.10            |
| Inhibition | 0.00             | 35.71     | 31.78       | 28.10    | 26.90            |
| S.D.       | 9.08             | 3.73      | 13.09       | 10.21    | 10.33            |
| n          | 24               | 3         | 4           | 6        | 6                |
| [%]        | (+)-Catechin     | Genistein | Taxifolin   | 3-MS     | Positive control |
| Mean       | 98.64            | 89.95     | 100.31      | 94.42    | 11.36            |
| Inhibition | 1.36             | 10.05     | -0.31       | 5.58     | 88.64            |
| S.D.       | 10.51            | 14.59     | 10.21       | 21.41    | 5.33             |
| n          | 4                | 4         | 5           | 3        | 3                |

3-MS= 3,4',5-Trimethoxy-trans-stilbene; Positive control – serum free starving overnight

**Table S3: Effects of quercetin (10  $\mu$ M, 5 min) on the phosphorylation status of Akt (Ser473) in primary endothelial cells (HUVEC): normalized values**

|            | Negative control | Quercetin |           | Negative control [%] | Quercetin [%] |
|------------|------------------|-----------|-----------|----------------------|---------------|
| [%]        |                  |           |           |                      |               |
| Mean       | 100.00           | 56.29     |           | 100.00               | 62.01         |
| Inhibition | 0.00             | 43.71     |           | 103.82               | 63.49         |
| S.D.       | 9.51             | 4.97      |           | 100.00               | 61.12         |
| n          | 5                | 5         | p= 0.0007 | 123.06               | 59.71         |
|            |                  |           |           | 100.00               | 50.28         |
